# Supplementary material
Source: ML conference proceedings conference paper supplement (https://openreview.net/forum?id=77N93tc3o5)
Supplement: supplementary_material [file attachment]

## A SYNTHETIC DATA EXPERIMENT

### A.1 SYNTHETIC DATA VISUALIZATION

Here, we visualize the ground-truth source pairs in synthetic data generated from 4 segments (Figure 8), 8 segments (Figure 9), and 14 segments (Figure 10).

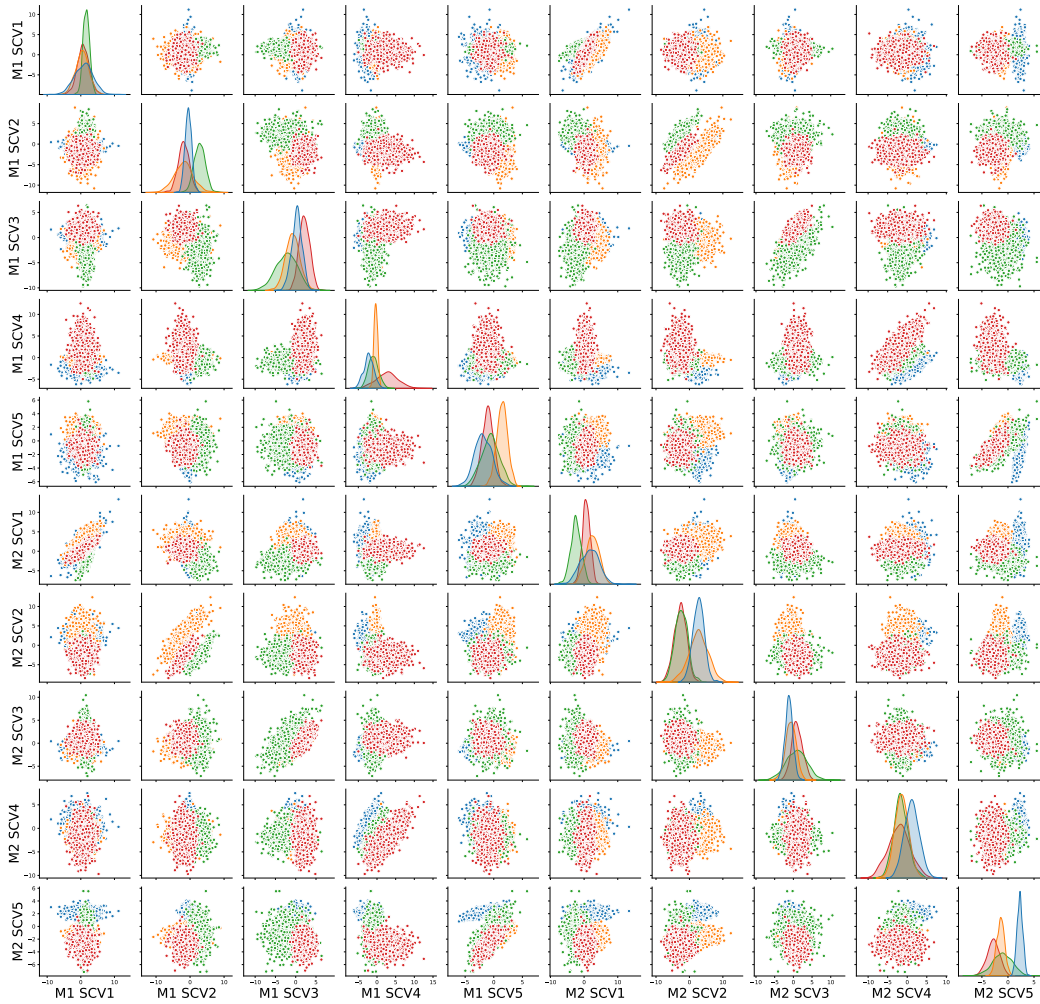

Figure 8: Visualization of synthetic data (5 sources, 4 segments, 700 observations per segment).

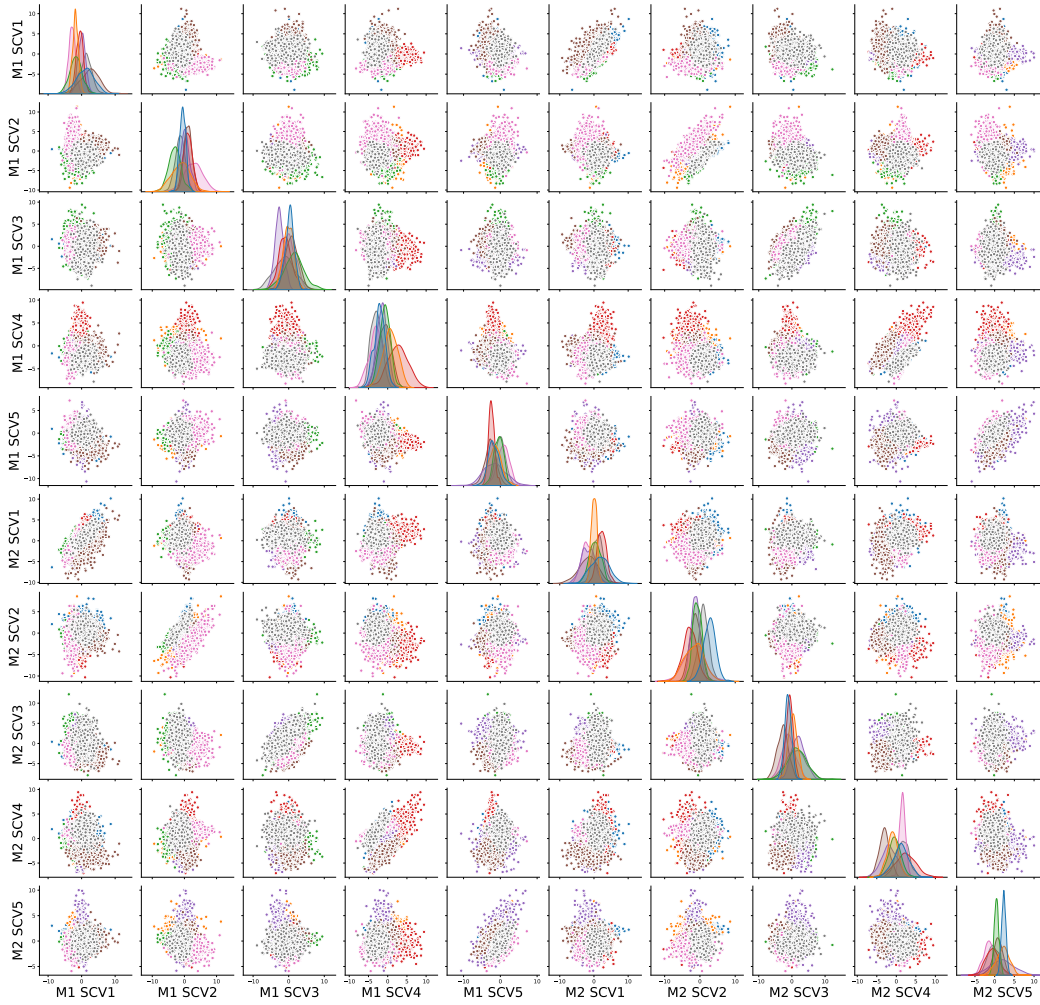

Figure 9: Visualization of synthetic data (5 sources, 8 segments, 350 observations per segment).

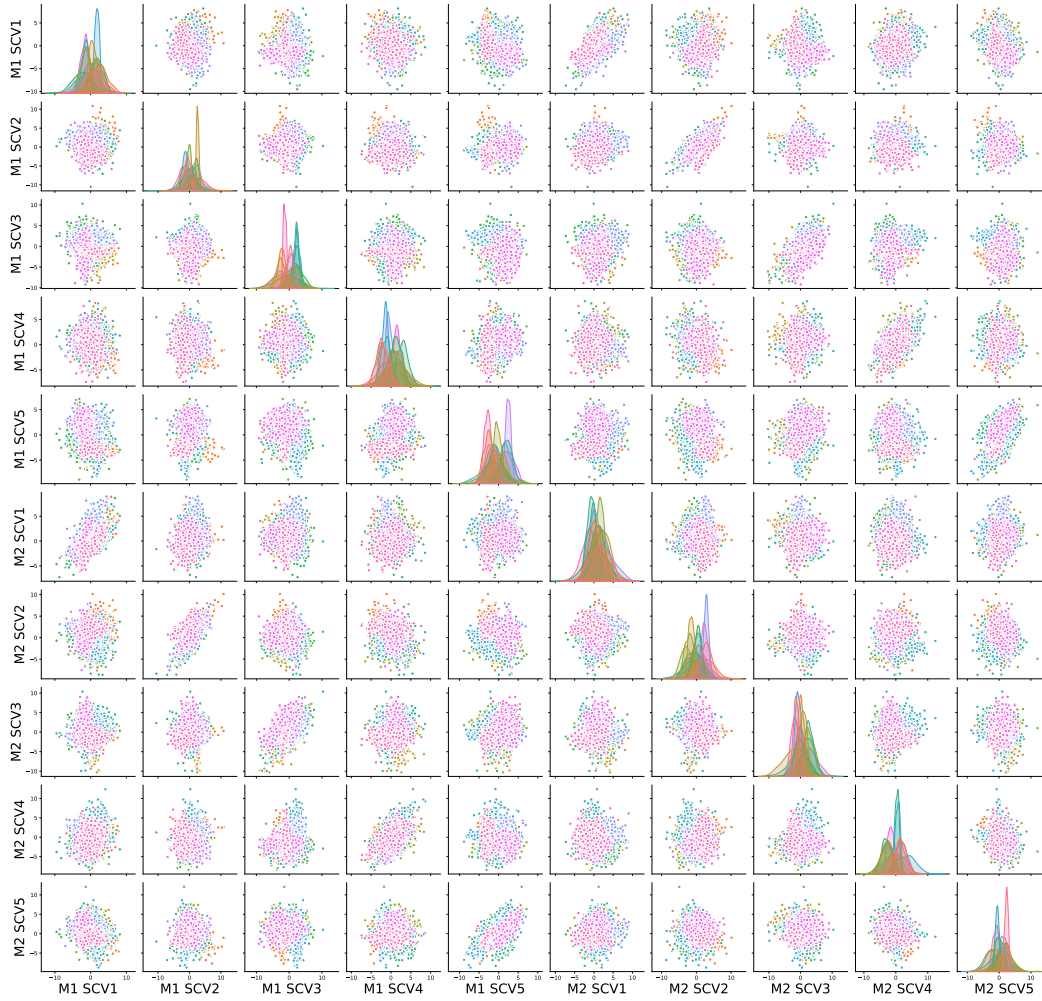

Figure 10: Visualization of synthetic data (5 sources, 14 segments, 200 observations per segment).

## A.2 AGGREGATED RDC MATRICES

Here, we present the aggregated RDC matrices across segments for four different data configurations: 5 sources and 4 segments (Figure 11); 5 sources and 8 segments (Figure 12); 15 sources and 4 segments (Figure 13); 15 sources and 8 segments (Figure 14).

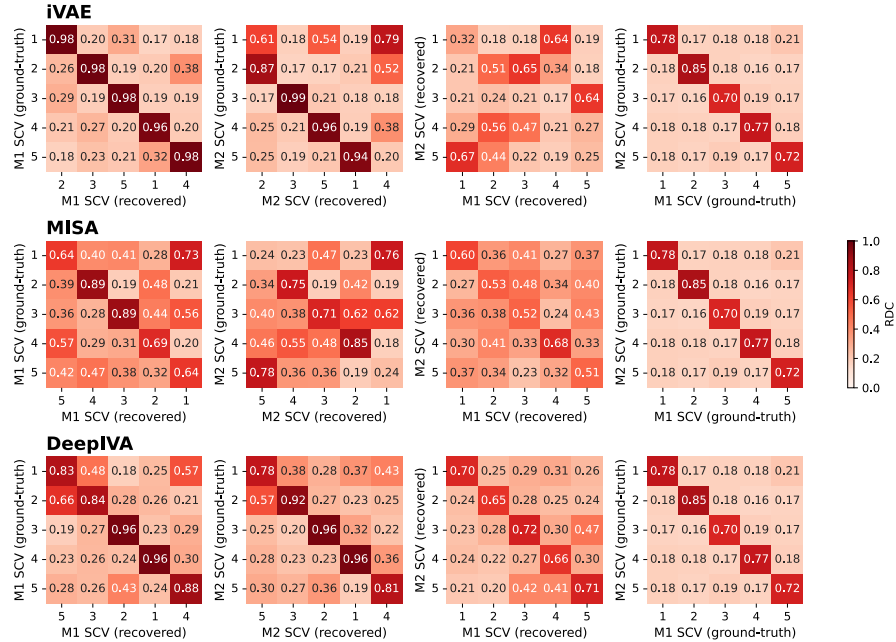

Figure 11: Synthetic data (5 sources, 4 segments): Aggregated RDC matrices across segments between recovered sources and ground-truth sources.

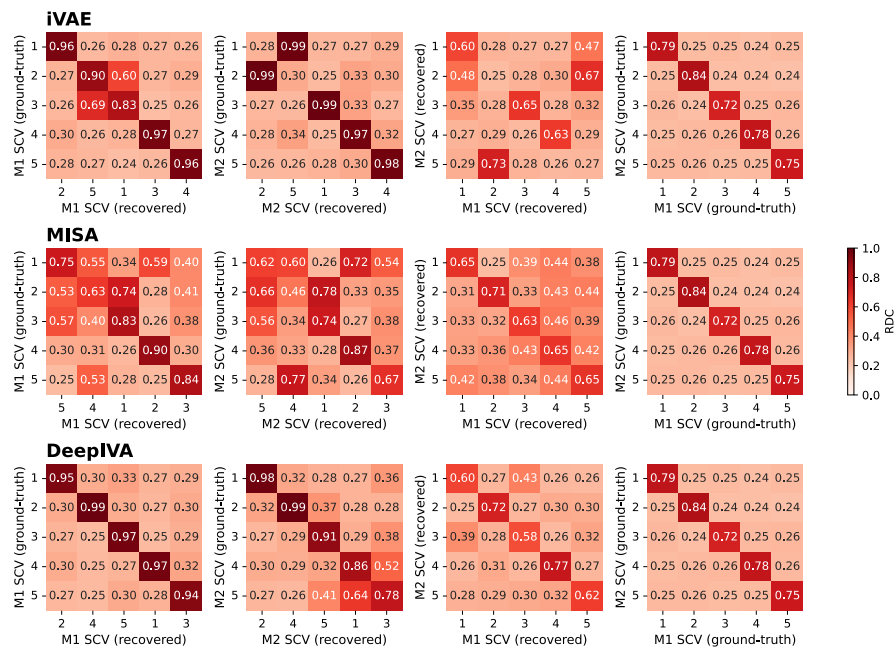

Figure 12: Synthetic data (5 sources, 8 segments): Aggregated RDC matrices across segments between recovered sources and ground-truth sources.

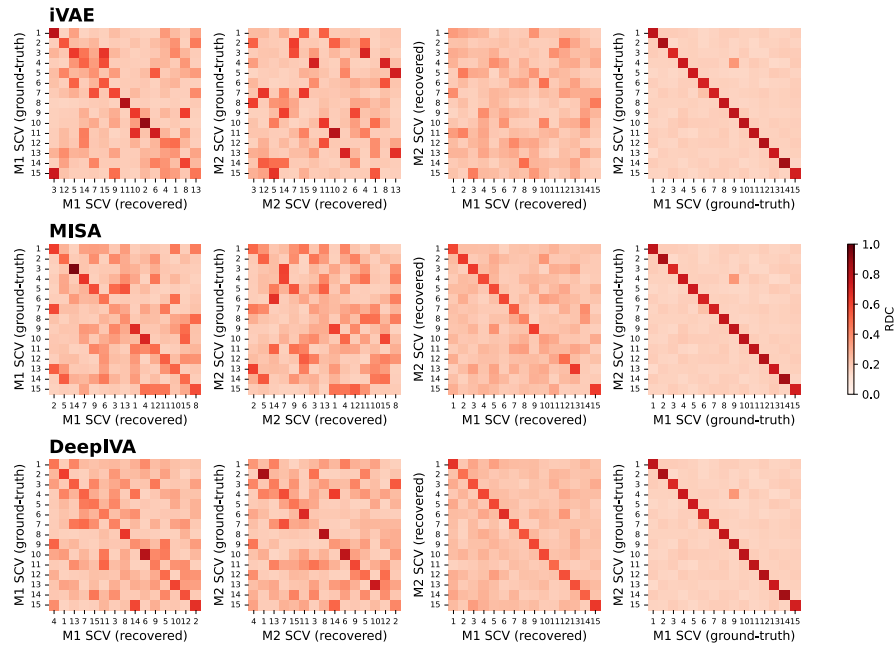

Figure 13: Synthetic data (15 sources, 4 segments): Aggregated RDC matrices across segments between recovered sources and ground-truth sources.

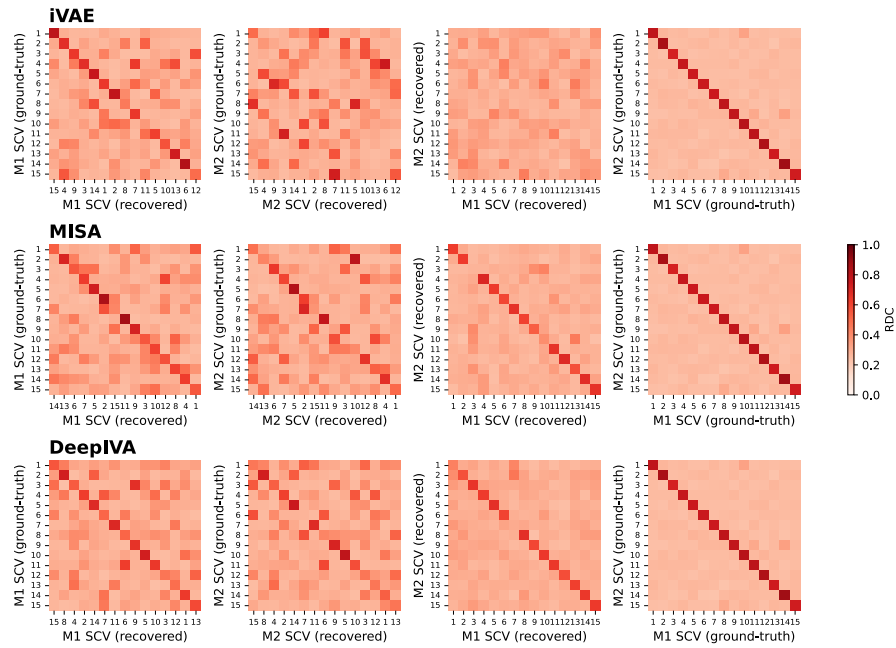

Figure 14: Synthetic data (15 sources, 8 segments): Aggregated RDC matrices across segments between recovered sources and ground-truth sources.

## B NEUROIMAGING DATA EXPERIMENT

### B.1 SINGULAR VALUE DECOMPOSITION

We perform singular value decomposition on sMRI GM and fMRI ALFF feature maps, respectively. According to Figure 15, we observe that 10 – 20 sources can capture most variance explained. Thus, we choose 15 latent sources for neuroimaging data.

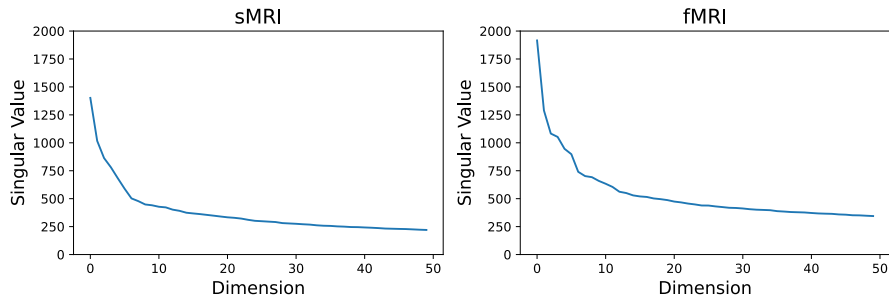

Figure 15: Singular values of neuroimaging data.
